# Supplementary material
Source: PubMed Central journal article supplement (PMC6233085)
Supplement: pnas.1722614115.sapp.pdf [file pnas.1722614115.sapp.pdf]

## Population-specific social dynamics in chimpanzees

Edwin J. C. van Leeuwen, Katherine A. Cronin, Daniel B. M. Haun

### Supporting Information Appendix: FIGURES & TABLES

**Figure S1.**

**Figure S2.**

**Figure S3.**

**Figure S4.**

**Figure S5.**

**Table S1.**

**Table S2.**

**Table S3.**

**Table S4.**

**Table S5.**

**Table S6.**

**Table S7.**

**References**

**Figure S1.** Proximity (means per group per year). The absence of significant interaction between population and year ( $\chi^2 = 0.11$ ,  $df = 6$ ,  $p = 0.86$ ) corroborates the temporal consistency of variation in social culture across the four neighboring populations of chimpanzees at Chimfunshi. Medians are represented by the bold, horizontal lines within the boxes. The boxes represent the interquartile range (IQR), the vertical lines attached to the boxes represent  $Q1-1.5$  IQR (lower) and  $Q3+1.5$  IQR (upper).

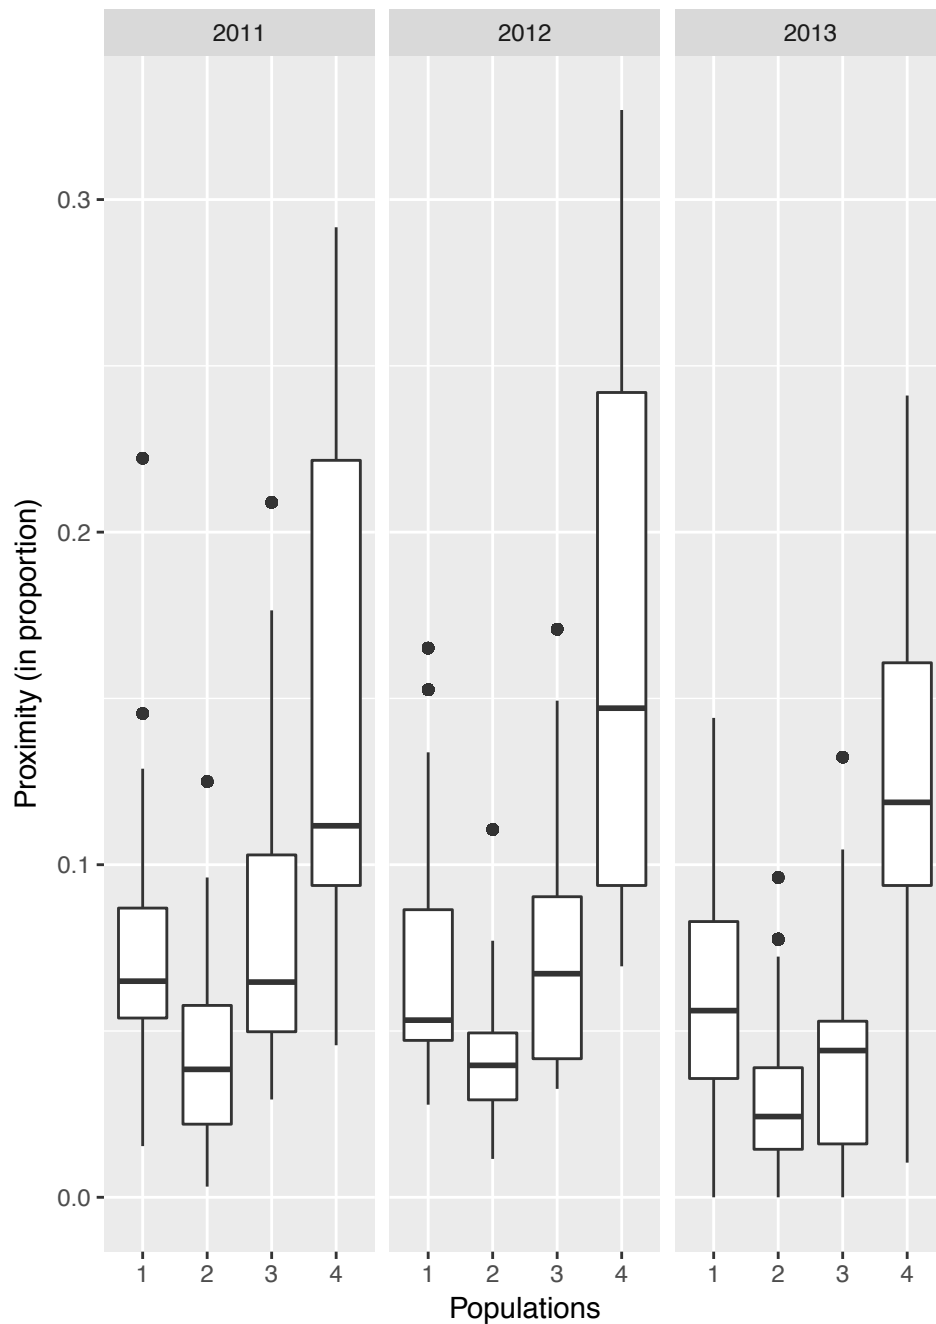

**Figure S2.** Grooming (means per group per year). The absence of significant interaction between population and year ( $\chi^2 = 2.89$ ,  $df = 6$ ,  $p = 0.29$ ) corroborates the temporal consistency of variation in social culture across the four neighboring populations of chimpanzees at Chimfunshi. Medians are represented by the bold, horizontal lines within the boxes. The boxes represent the interquartile range (IQR), the vertical lines attached to the boxes represent  $Q1-1.5$  IQR (lower) and  $Q3+1.5$  IQR (upper).

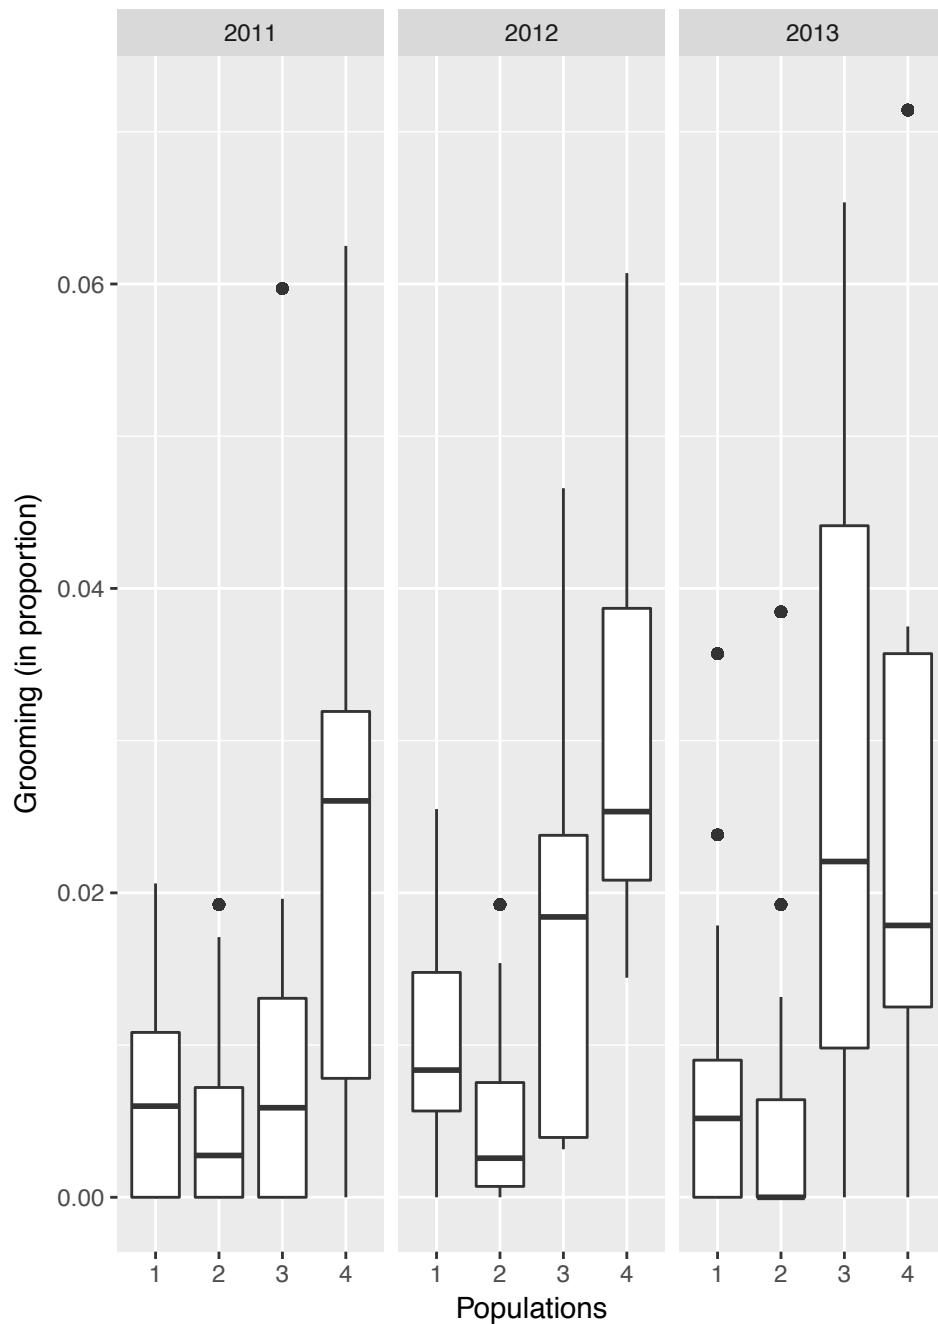

**Figure S3.** Social networks for the two chimpanzee populations matched in demographics and subspecies ( $a =$  population 3;  $b =$  population 4), based on twice-weight proximity association indices ( $x/(x + 2y_{AB} + y_A + y_B)$ ). Nodes represent individuals, the lines (edges) between nodes are weighted by the strength of their association. Edge-weights are comparable across populations; edge-weights  $< 0.1$  not shown for either population to improve clarity. Nodes are sized based on their weighted strength (). Nodes representing females are green, nodes representing males are orange, with the exception of the alpha males, which are blue.

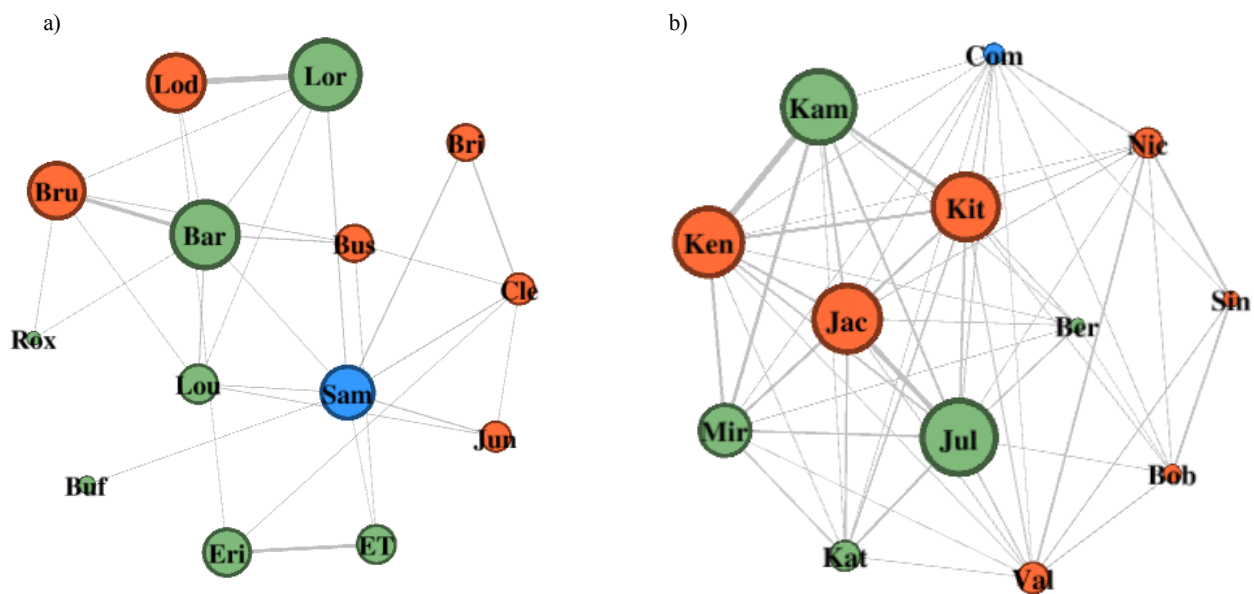

**Figure S4.** Social networks for the two chimpanzee populations matched in demographics and subspecies (a = population 3; b = population 4), based on twice-weight grooming association indices ( $x/(x + 2y_{AB} + y_A + y_B)$ ). Nodes represent individuals, the lines (edges) between nodes are weighted by the strength of their association. Edge-weights are comparable across populations; edge-weights  $< 0.1$  not shown for either population to improve clarity. Nodes are sized based on their weighted strength ( $\cdot$ ). Nodes representing females are green, nodes representing males are orange, with the exception of the alpha males, which are blue.

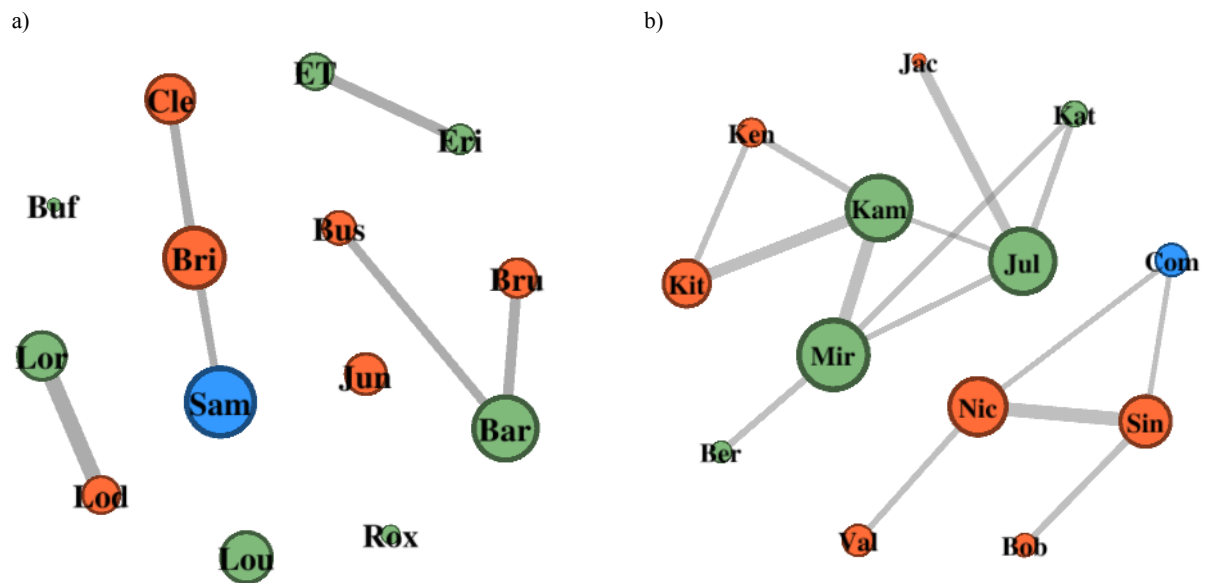

**Figure S5.** Aerial view of the habitats of the four chimpanzee populations under study (at the Chimfunshi Wildlife Orphanage). Numbers in circles represent population identity.

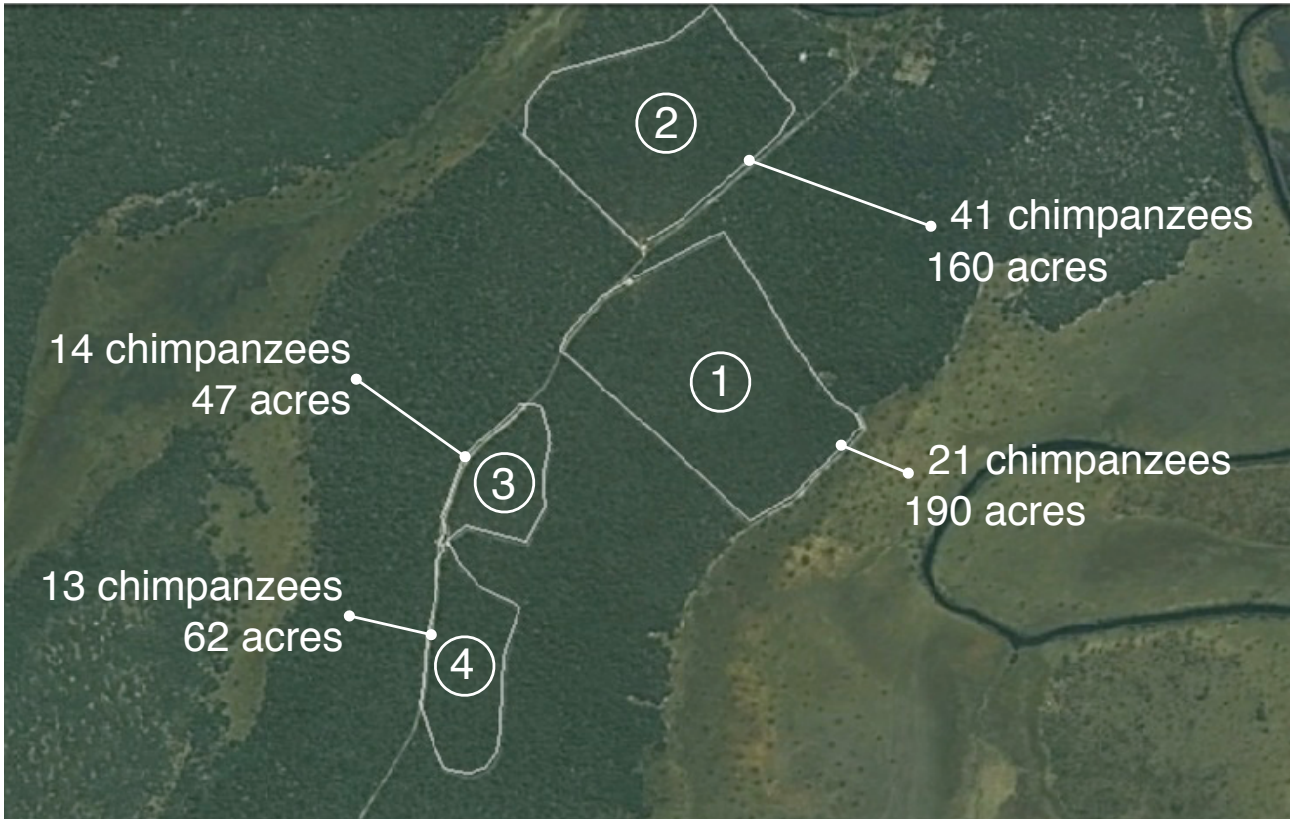

**Table S1.** Sociality expressed in the mean number of individuals congregating during focal follow sessions of our random sampling procedure, as conducted at four neighboring populations of semi-wild chimpanzees at the Chimfunshi Wildlife Orphanage Trust, Zambia.

| <b>Population</b> | <b>Population size</b> | <b>Party size (mean±sd)</b> |
|-------------------|------------------------|-----------------------------|
| 1                 | 24                     | 6.20±1.65                   |
| 2                 | 45                     | 8.96±2.57                   |
| 3                 | 14                     | 6.03±1.49                   |
| 4                 | 13                     | 8.15±1.74                   |

**Table S2.** Demographic details of the chimpanzees under study.

| Population | Subject     | Age* | Sex    | Dam         | Origin  | Subspecies     |
|------------|-------------|------|--------|-------------|---------|----------------|
| 1          | Pal         | 32,0 | male   | unknown     | wild    | schweinfurthii |
| 1          | Booboo      | 31,0 | male   | unknown     | wild    | schweinfurthii |
| 1          | Girly       | 31,0 | female | unknown     | wild    | schweinfurthii |
| 1          | Tobar       | 31,0 | male   | unknown     | wild    | verus          |
| 1          | Rita        | 30,0 | female | unknown     | wild    | schweinfurthii |
| 1          | Tara        | 30,0 | male   | unknown     | wild    | schweinfurthii |
| 1          | Ingrid      | 22,0 | female | Liza        | captive | schweinfurthii |
| 1          | Brenda      | 17,7 | female | Bella       | captive | schweinfurthii |
| 1          | Genny       | 16,0 | female | Girly       | captive | schweinfurthii |
| 1          | Renate      | 16,0 | female | Rita        | captive | schweinfurthii |
| 1          | Bob         | 11,9 | male   | Big Jane    | captive | schweinfurthii |
| 1          | Gerard      | 10,9 | male   | Girly       | captive | not determined |
| 1          | Ilse        | 10,8 | female | Ingrid      | captive | not determined |
| 1          | Regina      | 7,3  | female | Renate      | captive | not determined |
| 1          | Rusty       | 6,4  | male   | Rita        | captive | not determined |
| 1          | Chrissie    | 6,3  | female | Cleo        | captive | not determined |
| 1          | Innocentia  | 6,2  | female | Ingrid      | captive | not determined |
| 1          | BJ          | 5,8  | female | Big Jane    | captive | not determined |
| 1          | Gonzaga     | 5,2  | male   | Genny       | captive | not determined |
| 1          | Irene       | 1,1  | female | Ingrid      | captive | not determined |
| 1          | Rachel      | 0,7  | female | Renate      | captive | not determined |
| 2          | Noel        | 36,0 | female | unknown     | wild    | schweinfurthii |
| 2          | Donna       | 29,0 | female | unknown     | wild    | schweinfurthii |
| 2          | Coco        | 28,0 | female | unknown     | wild    | schweinfurthii |
| 2          | Little Jane | 28,0 | female | unknown     | wild    | schweinfurthii |
| 2          | Maggie      | 27,0 | female | unknown     | wild    | schweinfurthii |
| 2          | Misha       | 25,0 | female | unknown     | wild    | schweinfurthii |
| 2          | Dora        | 24,0 | female | unknown     | wild    | schweinfurthii |
| 2          | Pan         | 24,0 | male   | unknown     | wild    | schweinfurthii |
| 2          | Pippa       | 24,0 | female | unknown     | wild    | schweinfurthii |
| 2          | Trixie      | 23,0 | female | unknown     | wild    | schweinfurthii |
| 2          | Zsabu       | 23,0 | male   | unknown     | wild    | schweinfurthii |
| 2          | Diana       | 22,0 | female | unknown     | wild    | schweinfurthii |
| 2          | Masya       | 22,0 | female | unknown     | wild    | schweinfurthii |
| 2          | Violet      | 22,0 | female | unknown     | wild    | schweinfurthii |
| 2          | Little Judy | 18,0 | female | Little Jane | captive | not determined |
| 2          | Dolly       | 16,6 | female | Dora        | captive | schweinfurthii |



Population-specific social dynamics in chimpanzees

|   |                |      |        |             |         |                             |
|---|----------------|------|--------|-------------|---------|-----------------------------|
| 2 | Carol          | 16,4 | female | Coco        | captive | not determined              |
| 2 | Nikkie         | 15,7 | female | Noel        | captive | schweinfurthii              |
| 2 | Mikey          | 15,0 | male   | unknown     | wild    | schweinfurthii              |
| 2 | Tess           | 15,0 | female | Tina        | captive | not determined              |
| 2 | Tilly          | 12,2 | female | Trixie      | captive | not determined              |
| 2 | Maxine         | 11,8 | female | Misha       | captive | not determined              |
| 2 | David          | 11,5 | male   | Diana       | captive | not determined              |
| 2 | Debbie         | 11,3 | female | Donna       | captive | not determined              |
| 2 | Claire         | 10,8 | female | Coco        | captive | not determined              |
| 2 | Doug           | 10,2 | male   | Dora        | captive | not determined              |
| 2 | Nina           | 10,0 | female | Noel        | captive | not determined              |
| 2 | Vis            | 8,9  | male   | Violet      | captive | not determined              |
| 2 | Daisey         | 8,4  | female | Diana       | captive | not determined              |
| 2 | Mary           | 7,4  | female | Masya       | captive | not determined              |
| 2 | Long John      | 7,3  | male   | Little Judy | captive | not determined              |
| 2 | Max            | 6,6  | male   | Misha       | captive | not determined              |
| 2 | Little Jenkins | 6,2  | female | Little Jane | captive | not determined              |
| 2 | Moyo           | 5,6  | male   | Maggie      | captive | not determined              |
| 2 | Dizzy          | 5,4  | female | Diana       | captive | not determined              |
| 2 | Charity        | 5,2  | female | Carol       | captive | not determined              |
| 2 | Little Jones   | 2,7  | male   | Little Jane | captive | not determined              |
| 2 | Little Jacky   | 1,0  | male   | Little Judy | captive | not determined              |
| 2 | Martin         | 0,9  | male   | Misha       | captive | not determined              |
| 2 | Danny          | 0,9  | male   | Dora        | captive | not determined              |
| 2 | May            | 0,4  | female | Maggie      | captive | not determined              |
| 3 | Buffy          | 28   | female | unknown     | wild    | schweinfurthii              |
| 3 | Sampie         | 21   | male   | unknown     | wild    | schweinfurthii              |
| 3 | Clement        | 20   | male   | unknown     | wild    | schweinfurthii              |
| 3 | Brian          | 19   | male   | unknown     | wild    | schweinfurthii              |
| 3 | Barbie         | 18   | female | unknown     | wild    | schweinfurthii              |
| 3 | E.T.           | 18   | female | unknown     | wild    | schweinfurthii              |
| 3 | Roxy           | 18   | female | unknown     | wild    | schweinfurthii              |
| 3 | Junior         | 18   | male   | unknown     | wild    | schweinfurthii              |
| 3 | Lori           | 18   | female | Liza        | captive | not determined              |
| 3 | Louise         | 16   | female | unknown     | wild    | schweinfurthii <sup>#</sup> |
| 3 | Bussie         | 9    | male   | Barbie      | captive | not determined              |
| 3 | Erika          | 7    | female | E.T.        | captive | not determined              |
| 3 | Bruce          | 3,3  | male   | Barbie      | captive | not determined              |
| 3 | Lods           | 2,8  | female | Lori        | captive | not determined              |
| 4 | Nicky          | 22   | male   | unknown     | wild    | schweinfurthii              |

Population-specific social dynamics in chimpanzees

|   |           |      |        |         |         |                             |
|---|-----------|------|--------|---------|---------|-----------------------------|
| 4 | Bobby     | 20   | male   | unknown | wild    | schweinfurthii              |
| 4 | Sinkie    | 19   | male   | unknown | wild    | schweinfurthii              |
| 4 | Julie     | 19   | female | unknown | wild    | schweinfurthii              |
| 4 | Kambo     | 17   | female | unknown | wild    | schweinfurthii              |
| 4 | Kathy     | 14   | female | unknown | wild    | schweinfurthii              |
| 4 | Val       | 13   | male   | unknown | wild    | schweinfurthii              |
| 4 | Berta     | 13   | female | unknown | wild    | schweinfurthii <sup>#</sup> |
| 4 | Miracle   | 12,7 | female | Maggie  | captive | schweinfurthii              |
| 4 | Commander | 12   | male   | unknown | wild    | schweinfurthii              |
| 4 | Kit       | 8    | male   | Kambo   | captive | not determined              |
| 4 | Jack      | 4,9  | male   | Julie   | captive | not determined              |
| 4 | Ken       | 1,8  | male   | Kambo   | captive | not determined              |

\* At the end of the study (March 2013)

# Conflicting results, possibly “verus”

**Table S3.** Results of permutation tests comparing social network attributes across the four study populations. P-values correspond to probability that populations are distinct with regard to attribute. P-values in bold represent statistically significant results after Bonferroni-Holm corrections.

| <b>Social network attribute</b> | <b>Proximity (p-values)</b> | <b>Grooming (p-values)</b> |
|---------------------------------|-----------------------------|----------------------------|
| Strength                        | 0.518                       | 0.052                      |
| Eigenvalue centrality           | 0.015                       | <b>&lt;0.0001</b>          |
| Reach                           | 0.767                       | <b>&lt;0.0001</b>          |
| Clustering coefficient          | <b>&lt;0.0001</b>           | 0.061                      |
| Affinity                        | <b>&lt;0.0001</b>           | <b>&lt;0.0001</b>          |

**Table S4.** Social network attribute comparisons across the two closely matched (in terms of sex, age, origin, subspecies, and population size) study populations. P-values correspond to probability that populations are distinct with regard to attribute.

| <b>Social network attribute</b> | <b>Proximity (<i>p</i>-values)</b> | <b>Grooming (<i>p</i>-values)</b> |
|---------------------------------|------------------------------------|-----------------------------------|
| Strength                        | 0.353                              | 0.999                             |
| Eigenvalue centrality           | 0.889                              | 0.957                             |
| Reach                           | 0.998                              | 0.001                             |
| Clustering coefficient          | 0.006                              | 0.005                             |
| Affinity                        | <0.0001                            | 0.131                             |

**Table S5.** Clustering, modularity (based on eigenvector method from Newman (1), calculated from gregariousness), and social differentiation based on proximity data for each population.

| <b>Population</b> | <b>Clustering Coefficient</b> | <b>Modularity</b> | <b>Social differentiation</b> |
|-------------------|-------------------------------|-------------------|-------------------------------|
| 1                 | 0.1444                        | 0.354             | 1.369                         |
| 2                 | 0.0954                        | 0.307             | 1.549                         |
| 3                 | 0.1079                        | 0.281             | 0.793                         |
| 4                 | 0.2877                        | 0.180             | 0.544                         |

**Table S6.** Clustering, modularity (based on eigenvector method from Newman (1), calculated from gregariousness), and social differentiation based on grooming data for each population.

| <b>Population</b> | <b>Clustering Coefficient</b> | <b>Modularity</b> | <b>Social differentiation</b> |
|-------------------|-------------------------------|-------------------|-------------------------------|
| 1                 | 0.05                          | 0.576             | 2.716                         |
| 2                 | 0.03                          | 0.668             | 4.193                         |
| 3                 | 0.12                          | 0.446             | 1.545                         |
| 4                 | 0.25                          | 0.395             | 1.169                         |

**Table S7.** Individual social network attributes for weighted networks, used for assessing individuals' social integration as measured by closeness (1-meter proximity) and grooming.

| Measure                | What it means                                                             | Formula                                                                                                                |
|------------------------|---------------------------------------------------------------------------|------------------------------------------------------------------------------------------------------------------------|
| Strength               | How connected individuals are to other individuals                        | $s_i = \sum_j a_{ij}$                                                                                                  |
| Eigenvalue centrality  | Embeddedness in the group, in terms of number and strength of connections | $e_i = (\text{first eigenvector of } a)_i$                                                                             |
| Reach                  | Overall strength of neighbors                                             | $r_i = \sum_j a_{ij} \cdot s_j$                                                                                        |
| Clustering coefficient | How well connected neighbors are to each other                            | $c_{ij} = \frac{\sum_j \sum_k a_{ij} \cdot a_{ik} \cdot a_{jk}}{\max(a_{jk}) \cdot \sum_j \sum_k a_{ij} \cdot a_{jk}}$ |
| Affinity               | Weighted mean of strength of neighbors                                    | $f_i = r_i / s_i$                                                                                                      |

## References

1. Newman MEJ (2006) Modularity and community structure in networks. *Proc Natl Acad Sci U S A* 103(23):8577–82.
